# Supplementary material for: Encapsulation of trivalent phosphate anion within a rigidified π-stacked dimeric capsular assembly of tripodal receptor
Source: Royal Society of Chemistry journal article supplement (doi:10.1039/c1dt11195g), 2011-01-01
Supplement: c1dt11195g.pdf [file c1dt11195g.pdf]

## Electronic Supporting Information:

### Encapsulation of trivalent phosphate anion within a rigidified $\pi$ -stacked dimeric capsular assembly of tripodal receptor

*Sandeep Kumar Dey and Gopal Das\**

*Department of Chemistry, Indian Institute of Technology Guwahati, Assam, 781 03, India,.*

*Fax: +91-361-258-2349; Tel: +91-361-258-2313*

*E-mail: [gdas@iitg.ernet.in](mailto:gdas@iitg.ernet.in)*

---

|     |                                                                                          |      |
|-----|------------------------------------------------------------------------------------------|------|
| 1.  | Experimental section                                                                     | S-2  |
| 2.  | X-ray crystallography table                                                              | S-3  |
| 3.  | Crystal structure of complexes <b>1</b> and <b>2</b>                                     | S-4  |
| 4.  | Table for H-bond interactions of complexes <b>1</b> and <b>2</b>                         | S-5  |
| 5.  | Characterization of receptor <b>L</b> and complexes <b>1</b> and <b>2</b>                | S-7  |
| 6.  | $^1\text{H}$ NMR titration of <b>L</b> with $\text{H}_2\text{PO}_4^-$ ions and jobs plot | S-12 |
| 7.  | $^1\text{H}$ NMR titration of <b>L</b> with $\text{F}^-$ ions and jobs plot              | S-14 |
| 8.  | $^1\text{H}$ NMR titration of <b>L</b> with $\text{AcO}^-$ ions and jobs plot            | S-15 |
| 9.  | $^1\text{H}$ NMR titration of <b>L</b> with $\text{HSO}_4^-$ ions and jobs plot          | S-16 |
| 10. | $^1\text{H}$ NMR titration of <b>L</b> with $\text{Cl}^-$ ions and jobs plot             | S-17 |

---

### Experimental Section:

$^1\text{H}$  and  $^{13}\text{C}$  NMR spectra were recorded on a Varian FT-400 MHz spectrometer in  $\text{DMSO-}d_6$  at 298 K. Chemical shifts for  $^1\text{H}$  and  $^{13}\text{C}$  NMR were reported in parts per million (ppm), calibrated to the residual solvent peak set, with coupling constants reported in Hertz (Hz). The IR spectra were recorded on a Perkin-Elmer-Spectrum One FT-IR spectrometer with KBr disks in the range 4000-450  $\text{cm}^{-1}$ . All tetrabutylammonium (TBA) salts used were purchased from Sigma-Aldrich, USA and were used as received. Solvents used for the synthesis and crystallization experiments (THF and MeCN) were of HPLC grade and purchased from Spectrochem Ltd., India.

### Synthesis of tris-(thiourea) receptor, L:

Tripodal thiourea-based receptor, **L** was synthesized by the reaction of tris(2-aminoethyl)amine with three equivalents of 4-nitrophenyl isothiocyanate in THF by stirring overnight at RT. After overnight stirring, solvents were removed under *vacuo* and the obtained solid product was washed with plenty methanol to remove the unreacted reagents. Finally, the product was filtered and dried under vacuum to yield yellow solid of **L** (Yield = 84%). The ligand has been characterized by NMR, FT-IR, ESI-MS and elemental analysis. Single crystals of **L** suitable for X-ray diffraction analysis were grown from DMF at RT.

### $^1\text{H}$ NMR titration experiments:

Binding constants were obtained by  $^1\text{H}$  NMR (400 MHz) titrations of **L** with tetrabutylammonium salts of respective anions in  $\text{DMSO-}d_6$  at 298 K. The initial concentration of corresponding receptor was 10 mM. Aliquots of anions were added from 50 mM stock solutions of anions (up to 1:3 or 1:5 host/guest stoichiometries). The residual solvent peak in  $\text{DMSO-}d_6$  (2.50 ppm) was used as an internal reference, and each titration was performed with 10-15 measurements at room temperature.

Following equation was used to determine the K values:<sup>1</sup>

$$\Delta\delta = \{([A]_0 + [L]_0 + 1/K) \pm \sqrt{([A]_0 + [L]_0 + 1/K)^2 - 4[L]_0[A]_0}\} \Delta\delta_{\max} / 2[L]_0$$

**Table S1.** Crystallographic details of data collection for receptor **L** and complexes **1** and **2**.

| Parameters                                                | <b>L•DMF</b>                                                                  | <b>Complex 1</b>                                                                  | <b>Complex 2</b>                                                               |
|-----------------------------------------------------------|-------------------------------------------------------------------------------|-----------------------------------------------------------------------------------|--------------------------------------------------------------------------------|
| formula                                                   | C <sub>30</sub> H <sub>37</sub> N <sub>11</sub> O <sub>7</sub> S <sub>3</sub> | C <sub>106</sub> H <sub>174</sub> N <sub>25</sub> O <sub>16</sub> PS <sub>6</sub> | C <sub>45</sub> H <sub>69</sub> FN <sub>12</sub> O <sub>6</sub> S <sub>3</sub> |
| <i>Mr</i>                                                 | 759.92                                                                        | 2278.09                                                                           | 989.33                                                                         |
| Lattice system                                            | Triclinic                                                                     | Triclinic                                                                         | Triclinic                                                                      |
| Space group                                               | <i>P</i> -1                                                                   | <i>P</i> -1                                                                       | <i>P</i> -1                                                                    |
| <i>a</i> /Å                                               | 9.3675(5)                                                                     | 13.5840(7)                                                                        | 13.0874(4)                                                                     |
| <i>b</i> /Å                                               | 10.4400(6)                                                                    | 16.0821(8)                                                                        | 13.1320(4)                                                                     |
| <i>c</i> /Å                                               | 19.5297(11)                                                                   | 28.9547(15)                                                                       | 35.7500(11)                                                                    |
| $\alpha$ /°                                               | 94.671(4)                                                                     | 103.421(4)                                                                        | 79.965(2)                                                                      |
| $\beta$ /°                                                | 92.962(4)                                                                     | 93.523(4)                                                                         | 86.542(3)                                                                      |
| $\gamma$ /°                                               | 110.626(3)                                                                    | 92.808(4)                                                                         | 60.285(2)                                                                      |
| <i>V</i> /Å <sup>3</sup>                                  | 1774.95(18)                                                                   | 6128.0(6)                                                                         | 5252.1(3)                                                                      |
| <i>Z</i>                                                  | 2                                                                             | 2                                                                                 | 4                                                                              |
| <i>D<sub>c</sub></i> /g cm <sup>-3</sup>                  | 1.422                                                                         | 1.235                                                                             | 1.251                                                                          |
| $\mu$ Mo K $\alpha$ /mm <sup>-1</sup>                     | 0.271                                                                         | 0.194                                                                             | 0.201                                                                          |
| 2 theta                                                   | 28.340                                                                        | 28.460                                                                            | 28.360                                                                         |
| Total reflections                                         | 24704                                                                         | 92714                                                                             | 49038                                                                          |
| Independent reflections                                   | 8599                                                                          | 29779                                                                             | 25528                                                                          |
| Observed reflections                                      | 6935                                                                          | 24513                                                                             | 21878                                                                          |
| Parameters refined                                        | 463                                                                           | 1401                                                                              | 1217                                                                           |
| <i>R</i> <sub>1</sub> ; <i>wR</i> <sub>2</sub> (all data) | 0.0890; 0.2071                                                                | 0.0860; 0.2158                                                                    | 0.0875; 0.2076                                                                 |
| GOF ( <i>F</i> <sup>2</sup> )                             | 1.061                                                                         | 1.067                                                                             | 1.0061                                                                         |

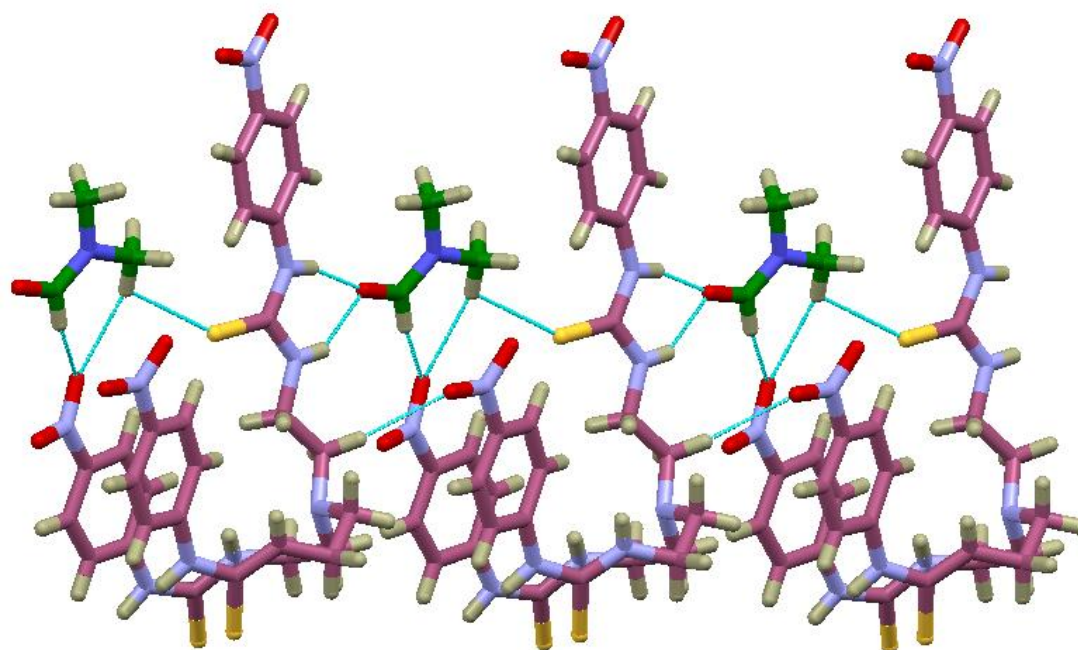

**Figure S1.** Ball and stick representation of crystal structure of **L•DMF** depicting the interactions (blue dotted lines) of the receptor molecules with lattice DMF (green).

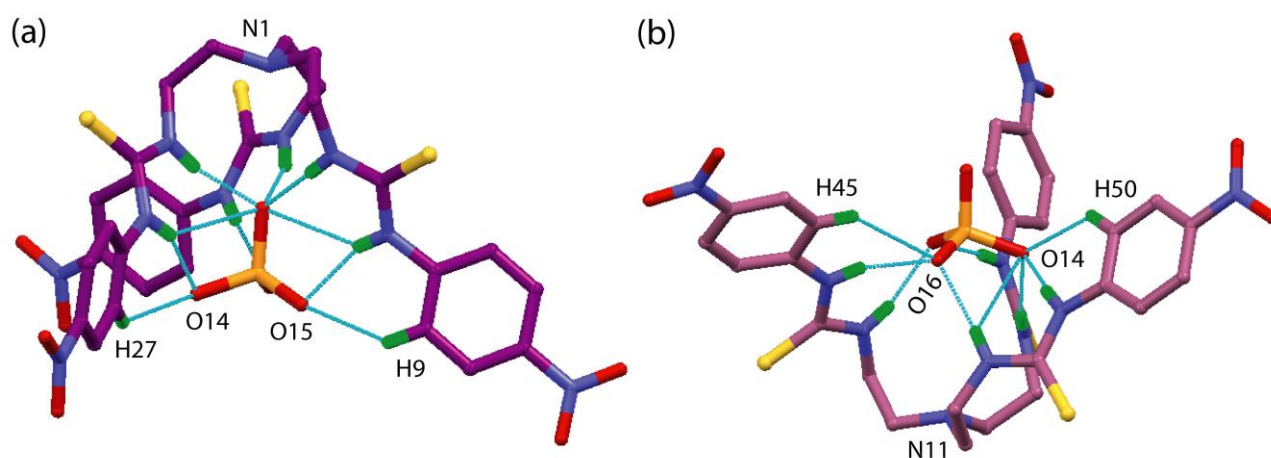

**Figure S2.** Ball and stick representation of crystal structure of **1** depicting the interactions (blue dotted lines) of the  $\text{-NH}$  and aryl  $\text{-CH}$  protons with phosphate anion when the  $d(\text{D}\cdots\text{A})$  is restricted to  $< 3.5 \text{ \AA}$  for H-bonding; (a) axial **L** coordinating to  $\text{PO}_4^{3-}$  and (b) facial **L** coordinating to  $\text{PO}_4^{3-}$ .

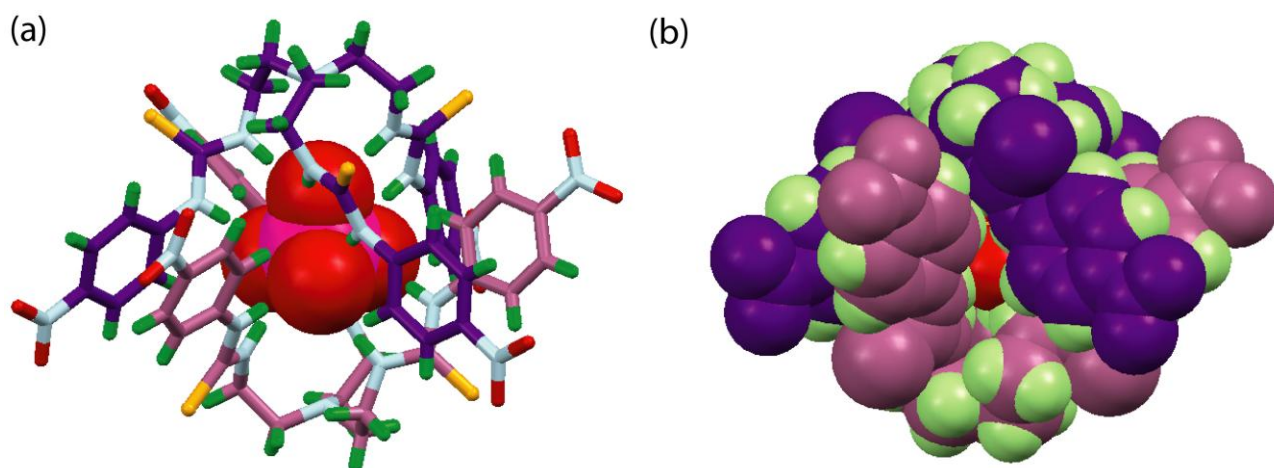

**Figure S3.** Spacefill representation depicting the full encapsulation of trivalent phosphate anion within the  $\pi$ -stacked dimeric cage of receptor **L**. Two symmetry independent molecules are shown in different colours and counteranions are omitted for clarity of presentation.

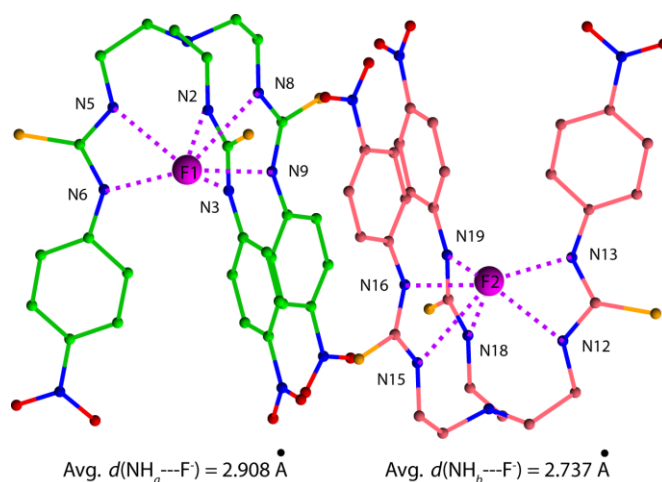

**Figure S4.** Ball and stick representation depicting the six H-bonding interactions of  $\text{F}^-$  within the tripodal cavity of two symmetry independent units of **L**. Counteranions and solvent molecules are omitted for clarity of presentation.

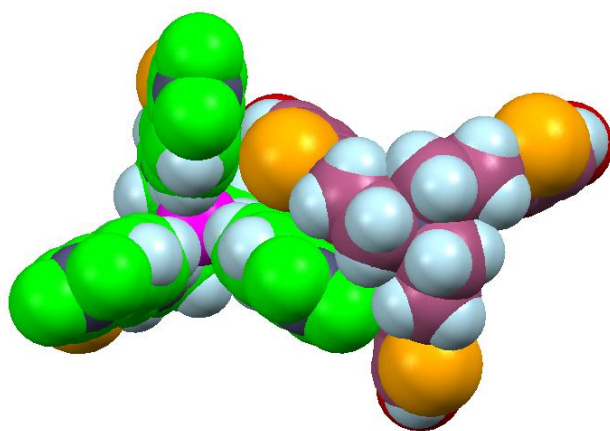

**Figure S5.** Spacefill representation depicting the encapsulation of fluoride anion within the tripodal scaffold of two symmetry independent **L** units assembled by  $\text{C-H} \cdots \pi$  and  $\pi \cdots \pi$  interactions.

**Table S2.** Hydrogen bonding interactions of  $\text{PO}_4^{3-}$  within the dimeric cage of **L** in complex **1**.

| Complex <b>1</b> , 3TBA[2L(PO <sub>4</sub> )]•2MeCN               |                                        |                                        |                                         |
|-------------------------------------------------------------------|----------------------------------------|----------------------------------------|-----------------------------------------|
| When $d(\text{D}\cdots\text{A}) < 3.00 \text{ \AA}$ for H-bonding |                                        |                                        |                                         |
| D-H $\cdots$ O                                                    | $d(\text{H}\cdots\text{O})/\text{\AA}$ | $d(\text{D}\cdots\text{O})/\text{\AA}$ | $\angle\text{D-H}\cdots\text{O}/^\circ$ |
| N2-H $\cdots$ O13                                                 | 1.92(2)                                | 2.781(4)                               | 178(2)                                  |
| N5-H $\cdots$ O13                                                 | 1.93(3)                                | 2.730(5)                               | 154(3)                                  |
| N8-H $\cdots$ O13                                                 | 1.90(2)                                | 2.733(4)                               | 161(3)                                  |
| N9-H $\cdots$ O14                                                 | 2.05(2)                                | 2.862(5)                               | 156(3)                                  |
| N12-H $\cdots$ O14                                                | 2.06(3)                                | 2.908(4)                               | 166(2)                                  |
| N19-H $\cdots$ O14                                                | 1.86(2)                                | 2.721(4)                               | 170(2)                                  |
| N3-H $\cdots$ O15                                                 | 1.97(2)                                | 2.776(4)                               | 153(2)                                  |
| N13-H $\cdots$ O15                                                | 1.89(3)                                | 2.749(5)                               | 174(2)                                  |
| N15-H $\cdots$ O15                                                | 1.96(2)                                | 2.792(4)                               | 162(2)                                  |
| N6-H $\cdots$ O16                                                 | 2.02(3)                                | 2.872(4)                               | 167(3)                                  |
| N16-H $\cdots$ O16                                                | 2.00(2)                                | 2.823(4)                               | 158(3)                                  |
| N18-H $\cdots$ O16                                                | 2.01(2)                                | 2.844(4)                               | 160(2)                                  |
| When $d(\text{D}\cdots\text{A}) < 3.50 \text{ \AA}$ for H-bonding |                                        |                                        |                                         |
| N3-H $\cdots$ O13                                                 | 2.69(2)                                | 3.403(4)                               | 141(2)                                  |
| N9-H $\cdots$ O13                                                 | 2.71(3)                                | 3.393(4)                               | 137(3)                                  |
| N18-H $\cdots$ O14                                                | 2.71(3)                                | 3.339(4)                               | 131(2)                                  |
| C27-H $\cdots$ O14                                                | 2.62(3)                                | 3.333(5)                               | 133(3)                                  |
| C50-H $\cdots$ O14                                                | 2.56(2)                                | 3.284(5)                               | 134(3)                                  |
| C9-H $\cdots$ O15                                                 | 2.54(2)                                | 3.164(5)                               | 124(3)                                  |
| C45-H $\cdots$ O16                                                | 2.69(3)                                | 3.423(6)                               | 135(4)                                  |

**Table S3.** Hydrogen bonding interactions of F<sup>-</sup> with receptor **L** in complex **2**.

| Complex <b>2</b> , TBA[L(F)]•MeCN |                     |                     |                         |
|-----------------------------------|---------------------|---------------------|-------------------------|
| D-H••••O                          | <i>d</i> (H••••O)/Å | <i>d</i> (D••••O)/Å | <D-H••••O/ <sup>o</sup> |
| N2-H••••F1                        | 2.15(2)             | 2.910(4)            | 146(2)                  |
| N3-H••••F1                        | 1.88(2)             | 2.729(4)            | 166(2)                  |
| N5-H••••F1                        | 2.19(2)             | 2.937(5)            | 145(3)                  |
| N6-H••••F1                        | 1.88(3)             | 2.730(5)            | 169(3)                  |
| N8-H••••F1                        | 2.10(2)             | 2.874(4)            | 148(3)                  |
| N9-H••••F1                        | 1.91(2)             | 2.749(3)            | 163(3)                  |
| N12-H••••F2                       | 2.12(2)             | 2.882(4)            | 147(2)                  |
| N13-H••••F2                       | 1.90(3)             | 2.743(5)            | 164(2)                  |
| N15-H••••F2                       | 2.21(2)             | 2.956(4)            | 145(2)                  |
| N16-H••••F2                       | 1.88(2)             | 2.731(3)            | 168(2)                  |
| N18-H••••F2                       | 2.13(2)             | 2.894(4)            | 148(3)                  |
| N19-H••••F2                       | 1.90(2)             | 2.744(5)            | 166(3)                  |

### Characterization of receptor L:

m.p. = 225-230 °C;  $^1\text{H-NMR}$  (400 MHz,  $\text{DMSO-}d_6$ )  $\delta$  2.814 (s, 6H,  $-\text{NCH}_2$ ), 3.660 (s, 6H,  $-\text{NCH}_2\text{CH}_2$ ), 7.764-7.787 (d, 6H, ArH), 8.127-8.149 (d, 6H, ArH), 8.174 (s, 3H,  $-\text{CH}_2\text{NH}$ ), 10.205 (s, 3H, Ar-NH);  $^{13}\text{C}$  NMR (100 MHz,  $\text{DMSO-}d_6$ ):  $\delta$  41.90 ( $\times 3\text{C}$ ,  $-\text{NCH}_2$ ), 51.62 ( $\times 3\text{C}$ ,  $-\text{NCH}_2\text{CH}_2$ ), 120.38 ( $\times 6\text{C}$ , ArH), 124.52 ( $\times 6\text{C}$ , ArH), 141.78 ( $\times 3\text{C}$ , ArH), 146.25 ( $\times 3\text{C}$ , ArH), 179.95 ( $\times 3\text{C}$ , C=S); ESI-MS:  $m/z$   $[\text{L}+\text{H}]^+$  687.1639; FT-IR (KBr,  $\nu$   $\text{cm}^{-1}$ ): 715, 1112, 1334, 1510, 2927, 3339; Anal. Calcd for  $\text{C}_{30}\text{H}_{37}\text{N}_{11}\text{O}_7\text{S}_3$ : C, 47.22; H, 4.40; N, 20.39. Found: C, 47.34; H, 4.18; N, 19.87.

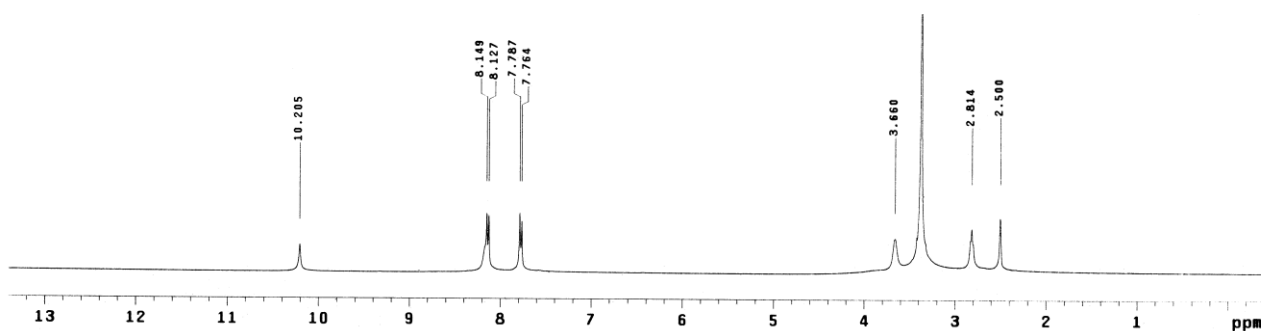

Figure S6.  $^1\text{H}$  NMR spectrum of L in  $\text{DMSO-}d_6$  at 298 K.

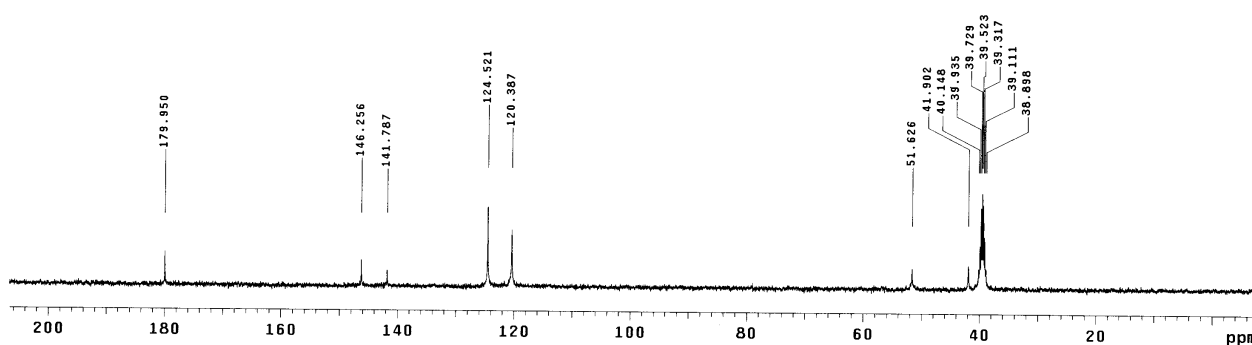

Figure S7.  $^{13}\text{C}$  NMR spectrum of L in  $\text{DMSO-}d_6$  at 298 K.



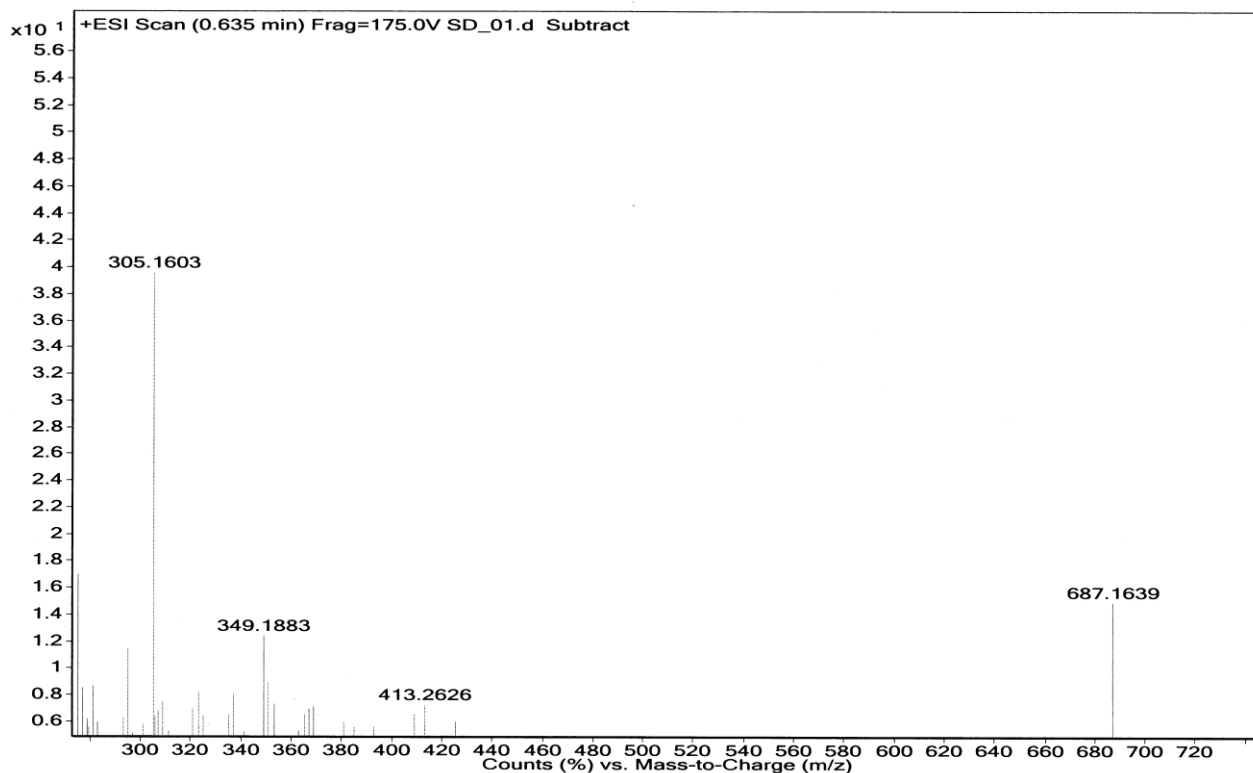

**Figure S8.** Positive ion mode ESI-mass spectrum of **L** in acetonitrile.

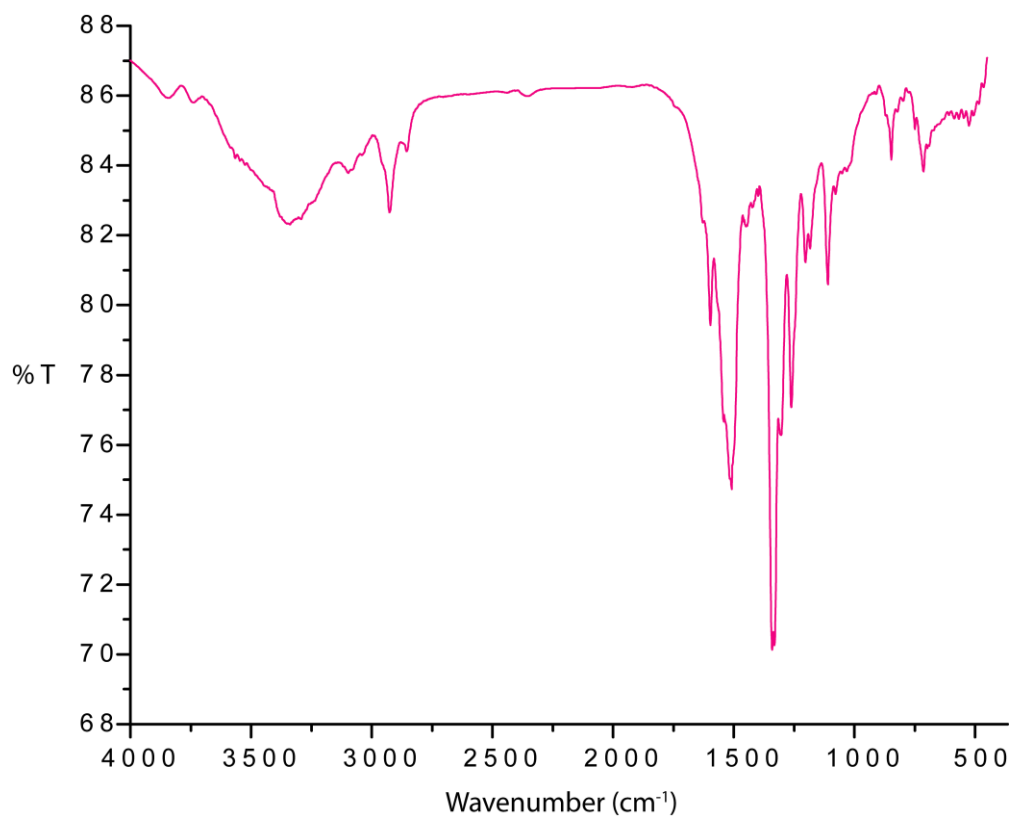

**Figure S9.** FT-IR spectrum of receptor **L** recorded in KBr pellet.

### Characterization of phosphate complex, 1:

$^1\text{H-NMR}$  (400 MHz,  $\text{DMSO-}d_6$ )  $\delta$  0.928-0.966 (t,  $-\text{CH}_3$ , TBA), 1.285-1.358 (q,  $-\text{CH}_2$ , TBA), 1.559-1.577 (t,  $-\text{CH}_2$ , TBA), 3.046-3.087 (t,  $-\text{NCH}_2$ , TBA), 1.933-1.959 (q,  $\text{CH}_3\text{CN}$ ), 2.703 (s, 12H,  $-\text{NCH}_2$ ), 3.507 (s, 12H,  $-\text{NCH}_2\text{CH}_2$ ), 7.746-7.807 (q, ArH), 11.935 (s, 6H,  $-\text{CH}_2\text{NH}$ ), 12.998 (s, 6H, Ar-NH);  $^{13}\text{C NMR}$  (100 MHz,  $\text{DMSO-}d_6$ ):  $\delta$  13.85 ( $\times 12\text{C}$ ,  $-\text{CH}_3$ , TBA), 20.37 ( $\times 12\text{C}$ ,  $-\text{CH}_2$ , TBA), 24.35 ( $\times 12\text{C}$ ,  $-\text{CH}_2$ , TBA), 59.37 ( $\times 12\text{C}$ ,  $-\text{NCH}_2$ , TBA), 44.30 ( $\times 6\text{C}$ ,  $-\text{NCH}_2$ ), 56.65 ( $\times 6\text{C}$ ,  $-\text{NCH}_2\text{CH}_2$ ), 121.17 ( $\times 12\text{C}$ , ArH), 124.33 ( $\times 12\text{C}$ , ArH), 141.82 ( $\times 6\text{C}$ , ArH), 149.85 ( $\times 6\text{C}$ , ArH), 181.73 ( $\times 6\text{C}$ ,  $\text{C}=\text{S}$ ); FT-IR (KBr,  $\nu \text{ cm}^{-1}$ ): 1009, 1110, 1277, 1327, 1510, 1561, 2964, 3440.

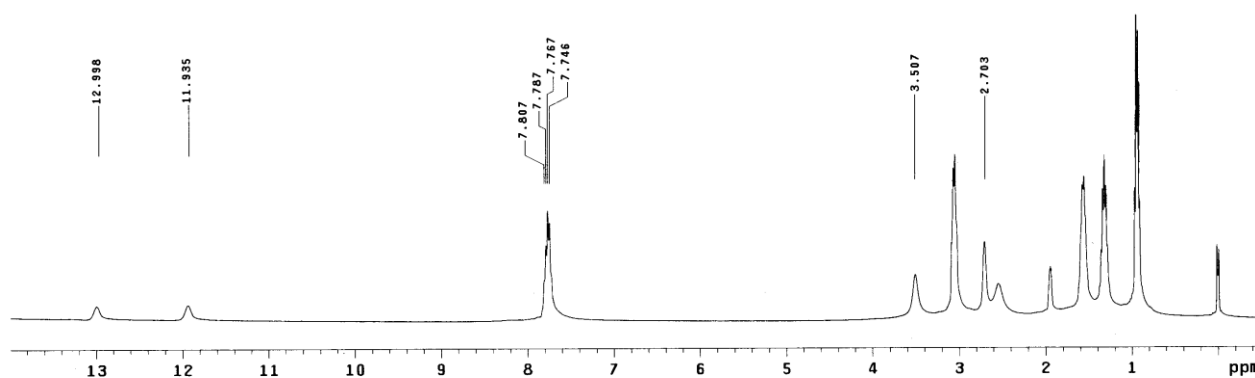

Figure S10.  $^1\text{H NMR}$  spectrum of phosphate complex (1) in  $\text{DMSO-}d_6$  at 298 K.

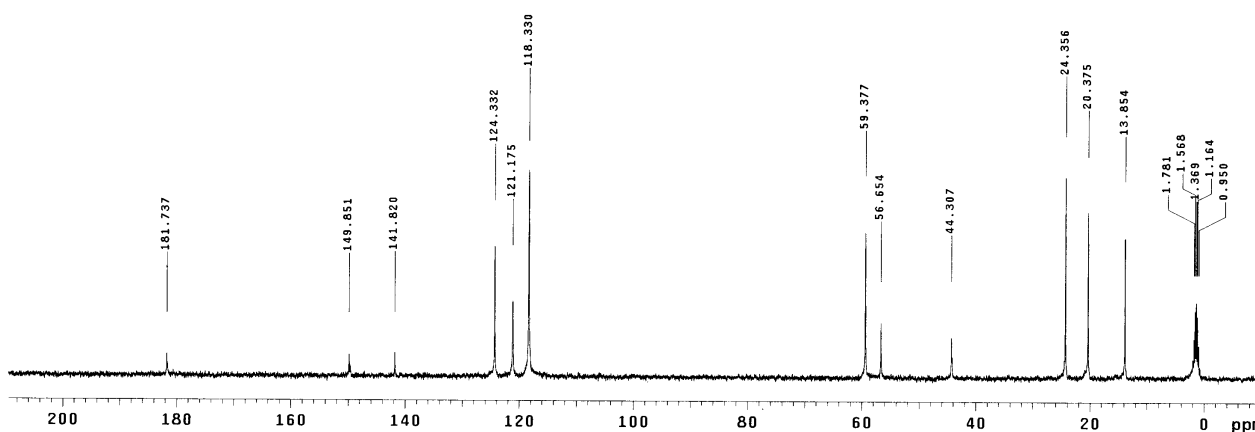

Figure S11.  $^{13}\text{C NMR}$  spectrum of phosphate complex (1) in  $\text{DMSO-}d_6$  at 298 K.

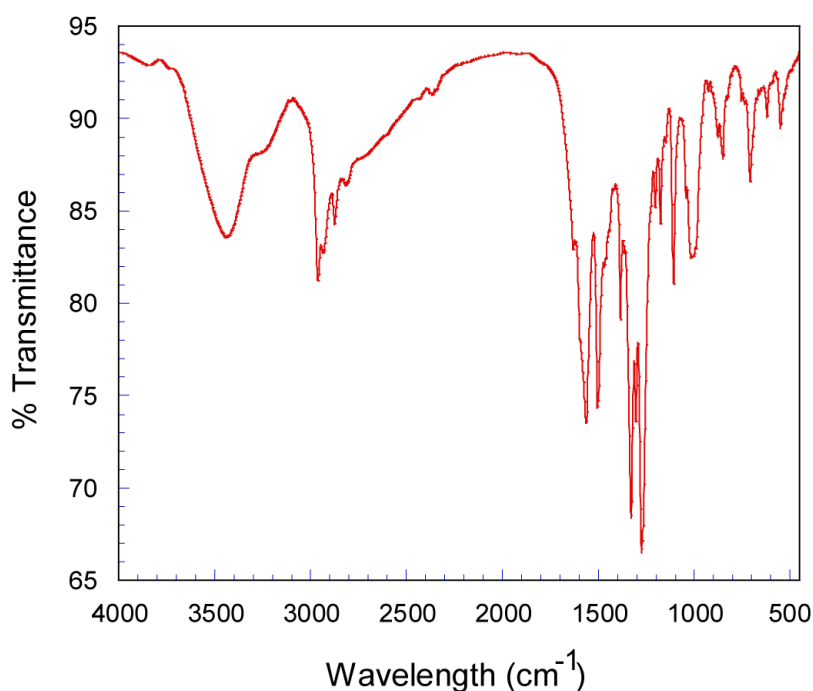

**Figure S12.** FT-IR spectrum of phosphate complex (**1**) recorded in KBr pellet.

**Characterization of fluoride complex, 2:**

$^1\text{H-NMR}$  (400 MHz,  $\text{DMSO-}d_6$ )  $\delta$  0.915-0.951 (t,  $-\text{CH}_3$ , TBA), 1.282-1.335 (q,  $-\text{CH}_2$ , TBA), 1.563 (s,  $-\text{CH}_2$ , TBA), 3.131-3.171 (t,  $-\text{NCH}_2$ , TBA), 2.077 (s,  $\text{CH}_3\text{CN}$ ), 2.707 (s, 6H,  $-\text{NCH}_2$ ), 3.613 (s, 6H,  $-\text{NCH}_2\text{CH}_2$ ), 7.947-7.968 (d, 6H, ArH), 8.090-8.112 (d, 6H, ArH), 9.035 (s, 3H,  $-\text{CH}_2\text{NH}$ ), 11.915 (s, 3H, Ar-NH);  $^{13}\text{C NMR}$  (100 MHz,  $\text{DMSO-}d_6$ ):  $\delta$  13.03 ( $\times 4\text{C}$ ,  $-\text{CH}_3$ , TBA), 19.57 ( $\times 4\text{C}$ ,  $-\text{CH}_2$ , TBA), 23.54 ( $\times 4\text{C}$ ,  $-\text{CH}_2$ , TBA), 58.59 ( $\times 4\text{C}$ ,  $-\text{NCH}_2$ , TBA), 40.91 ( $\times 3\text{C}$ ,  $-\text{NCH}_2$ ), 51.24 ( $\times 3\text{C}$ ,  $-\text{NCH}_2\text{CH}_2$ ), 120.05 ( $\times 6\text{C}$ , ArH), 124.42 ( $\times 6\text{C}$ , ArH), 139.44 ( $\times 3\text{C}$ , ArH), 151.24 ( $\times 3\text{C}$ , ArH), 180.99 ( $\times 3\text{C}$ , C=S); FT-IR (KBr,  $\nu \text{ cm}^{-1}$ ): 843, 1108, 1331, 1510, 1537, 2965, 3273.

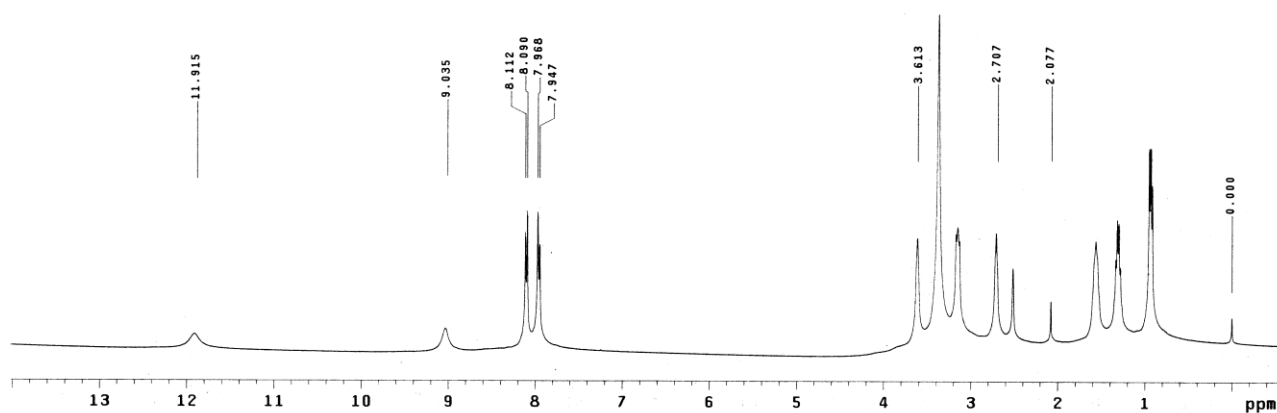

**Figure S13.**  $^1\text{H NMR}$  spectrum of fluoride complex (**2**) in  $\text{DMSO-}d_6$  at 298 K.

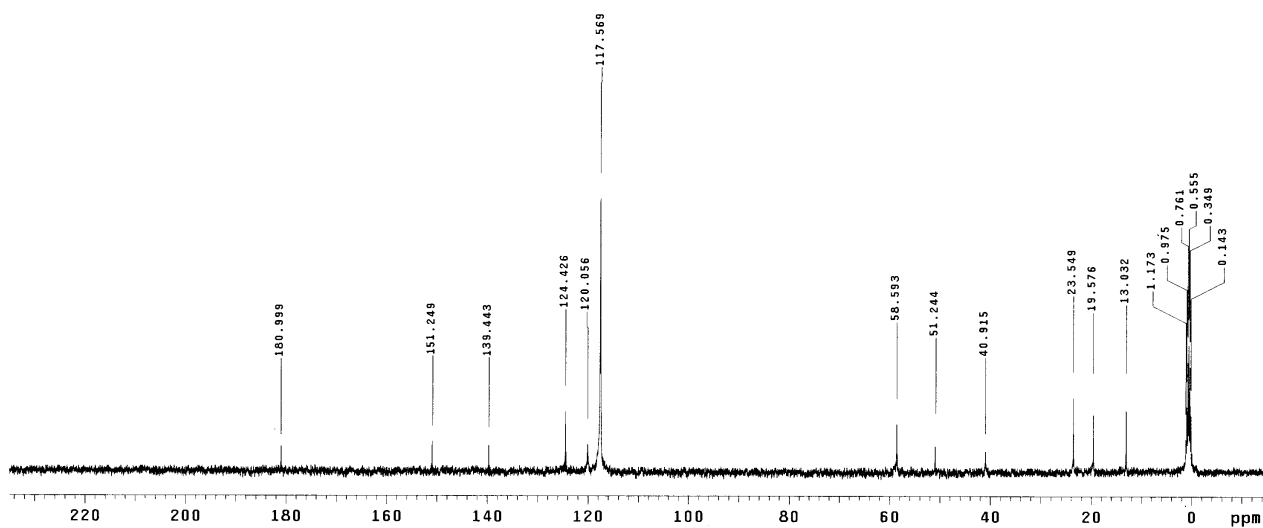

**Figure S14.**  $^{13}\text{C}$  NMR spectrum of fluoride complex (**2**) in  $\text{DMSO-}d_6$  at 298 K.

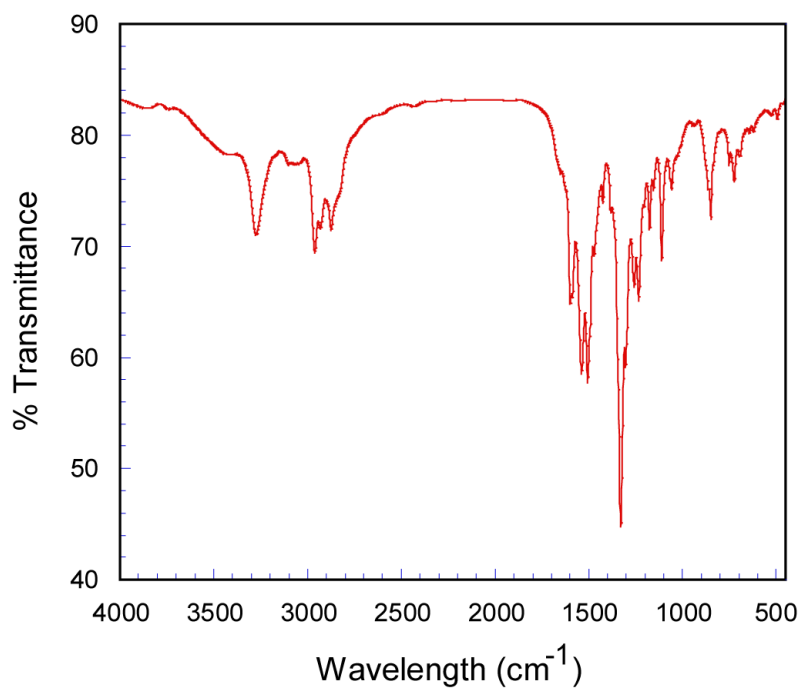

**Figure S15.** FT-IR spectrum of fluoride complex (**2**) recorded in KBr pellet.

### Anion binding study by $^1\text{H}$ NMR titration experiments:

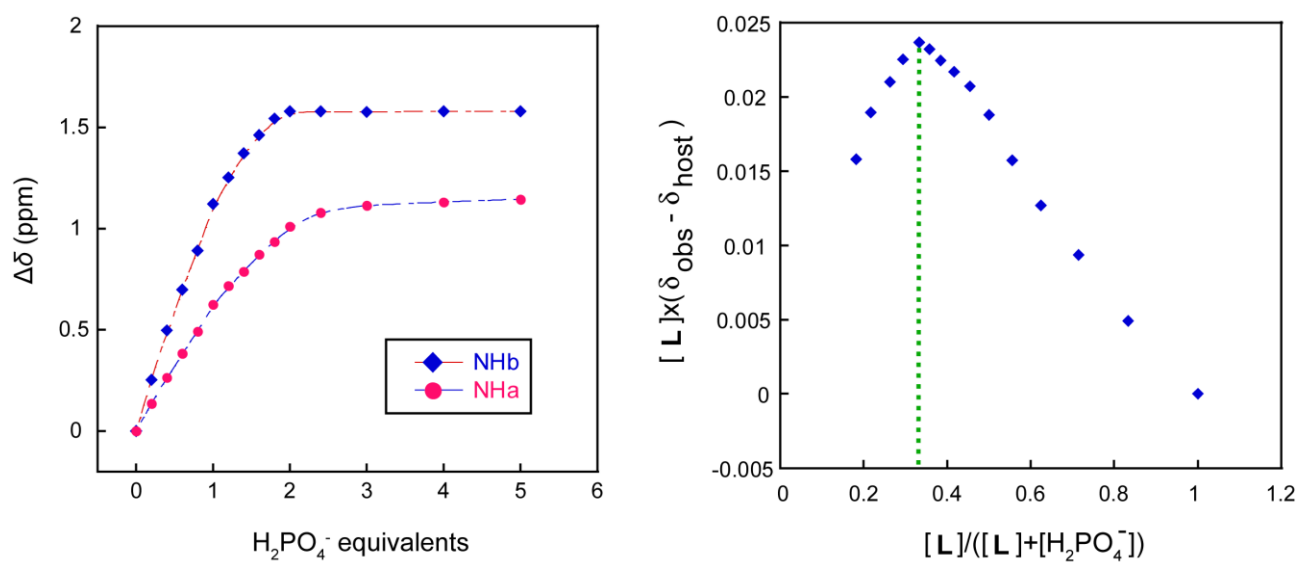

**Figure S16.** Change in chemical shift of  $-\text{NH}$  resonances of **L** (10 mM) with increasing conc. of standard  $\text{H}_2\text{PO}_4^-$  solution (50 mM) in  $\text{DMSO}-d_6$  at 298 K and the corresponding Job's plot suggesting the formation of 1:2 host/guest complexes in solution.

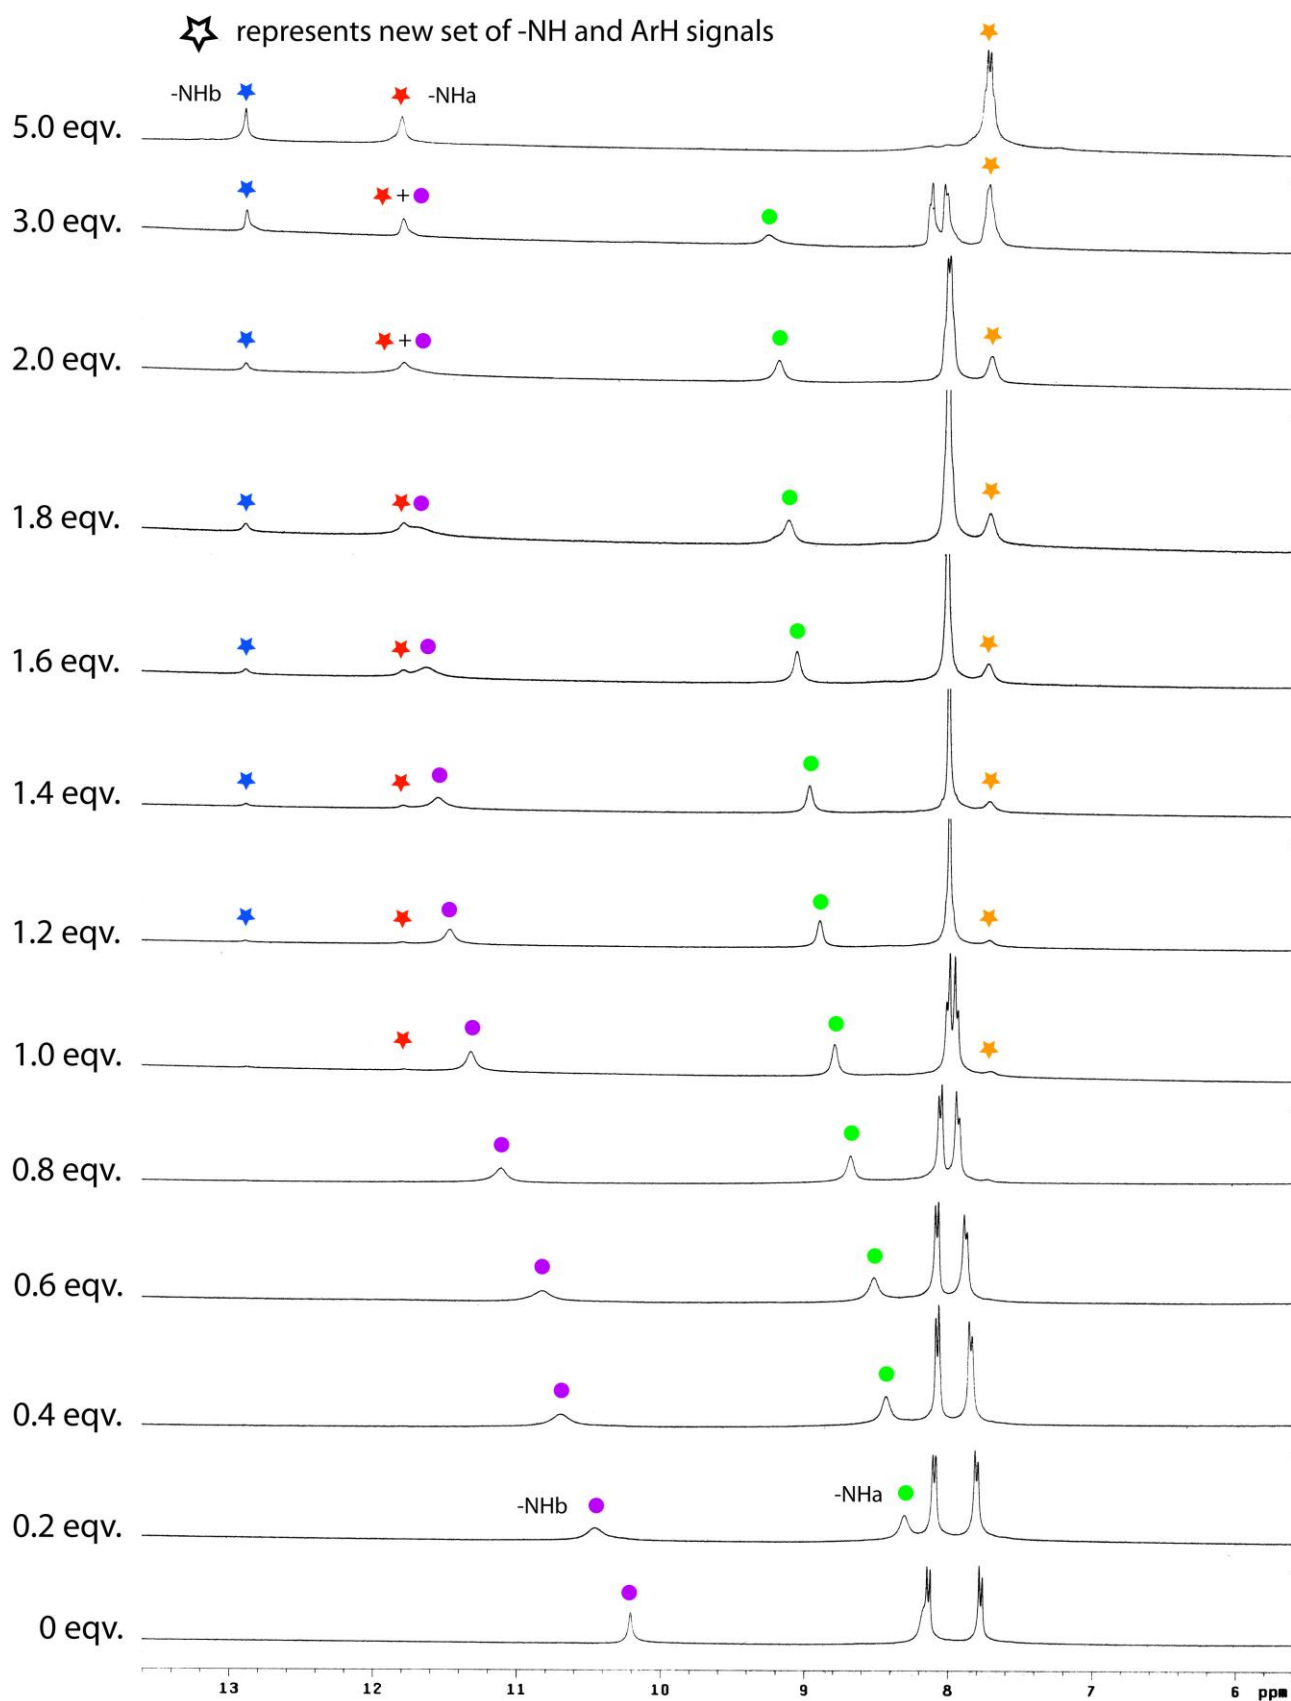

Figure S17. Expanded  $^1\text{H}$  NMR spectra of L upon titration with  $\text{H}_2\text{PO}_4^-$  ions in  $\text{DMSO}-d_6$ .

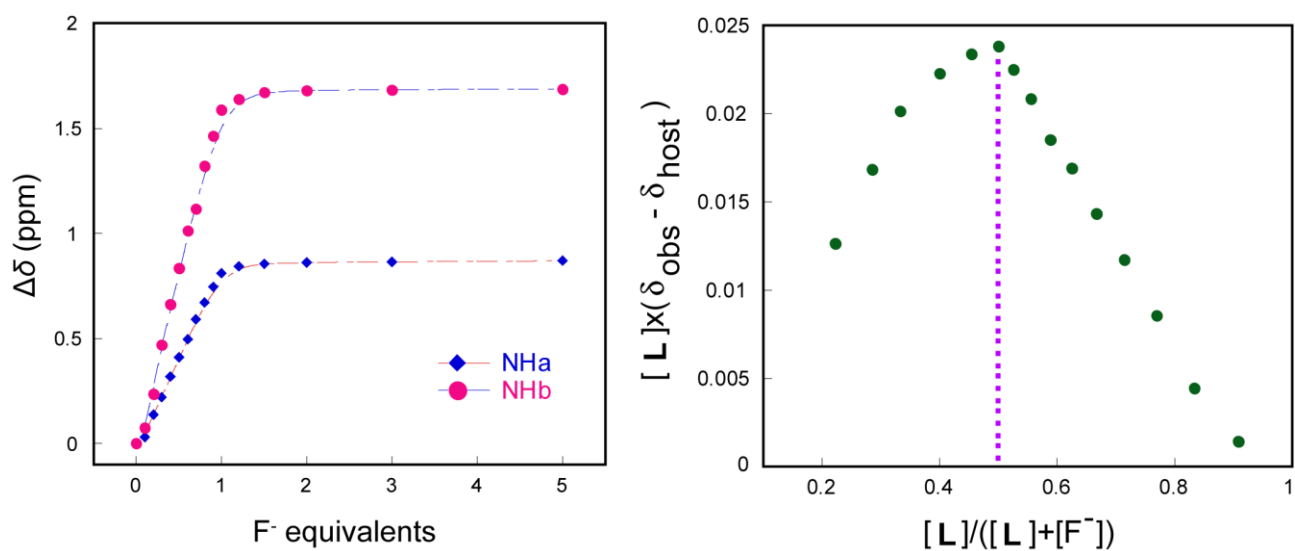

**Figure S18.** Change in chemical shift of  $-NH$  resonances of **L** (10 mM) with increasing conc. of standard  $F^-$  solution (50 mM) in  $DMSO-d_6$  at 298 K and the corresponding Job's plot.

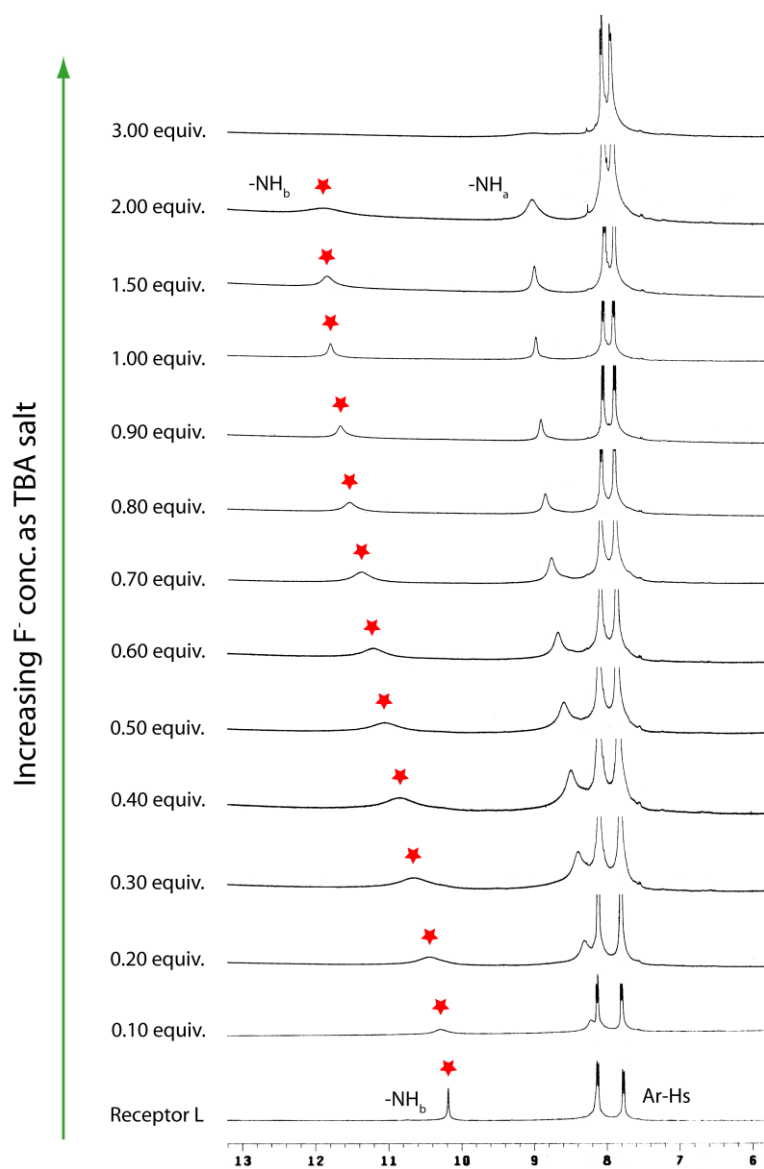

**Figure S19.** Expanded  $^1H$  NMR spectra of **L** upon gradual addition of TBAF in  $DMSO-d_6$ .

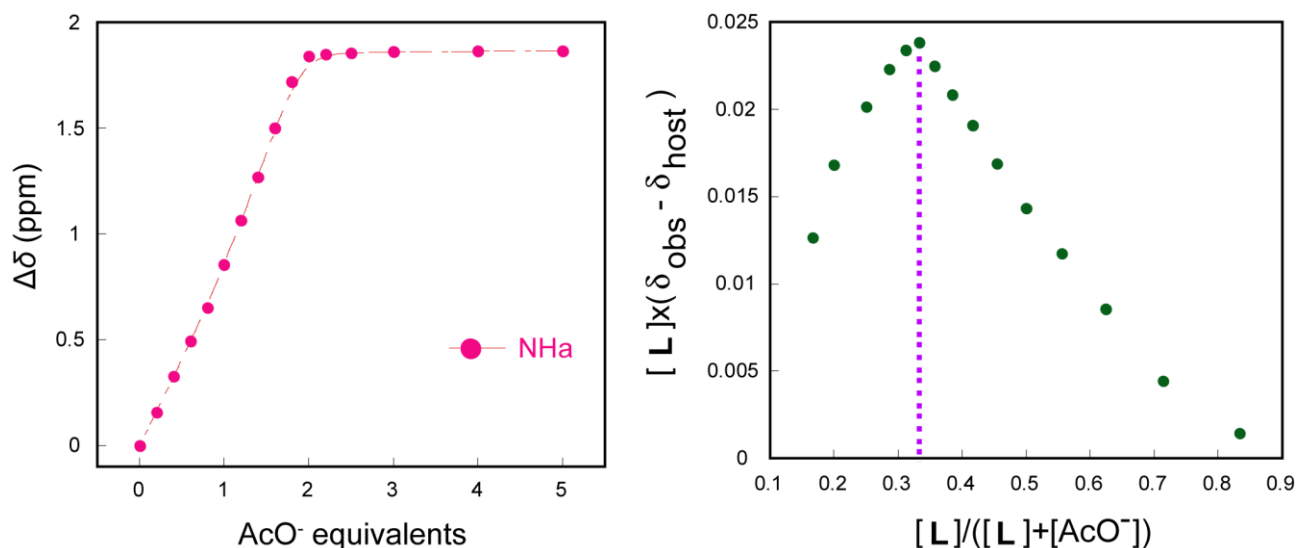

**Figure S20.** Change in chemical shift of  $-\text{NH}$  resonances of **L** (10 mM) with increasing conc. of standard  $\text{AcO}^-$  solution (50 mM) in  $\text{DMSO}-d_6$  at 298 K and the corresponding Job's plot.

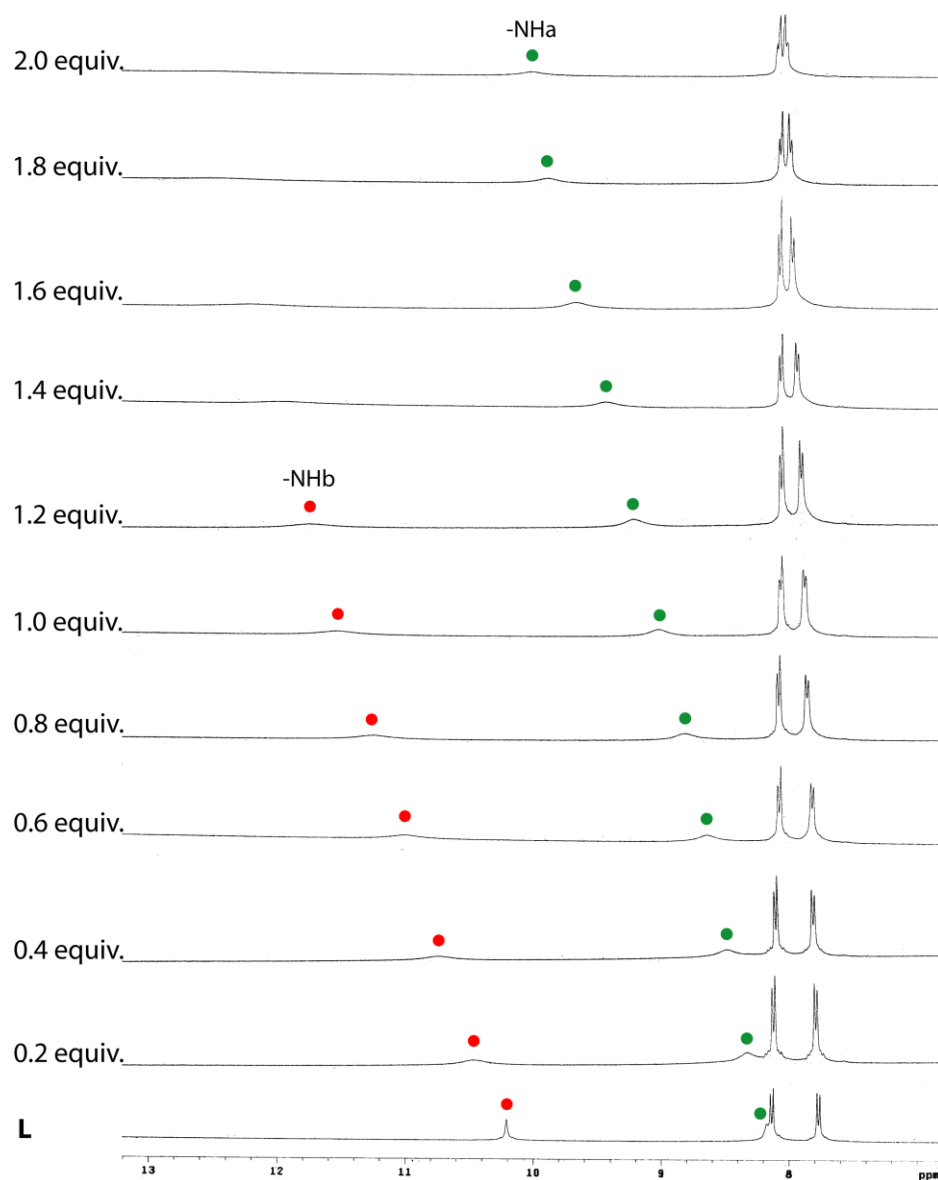

**Figure S21.** Expanded  $^1\text{H}$  NMR spectra of **L** upon titration with  $\text{AcO}^-$  ions in  $\text{DMSO}-d_6$ .



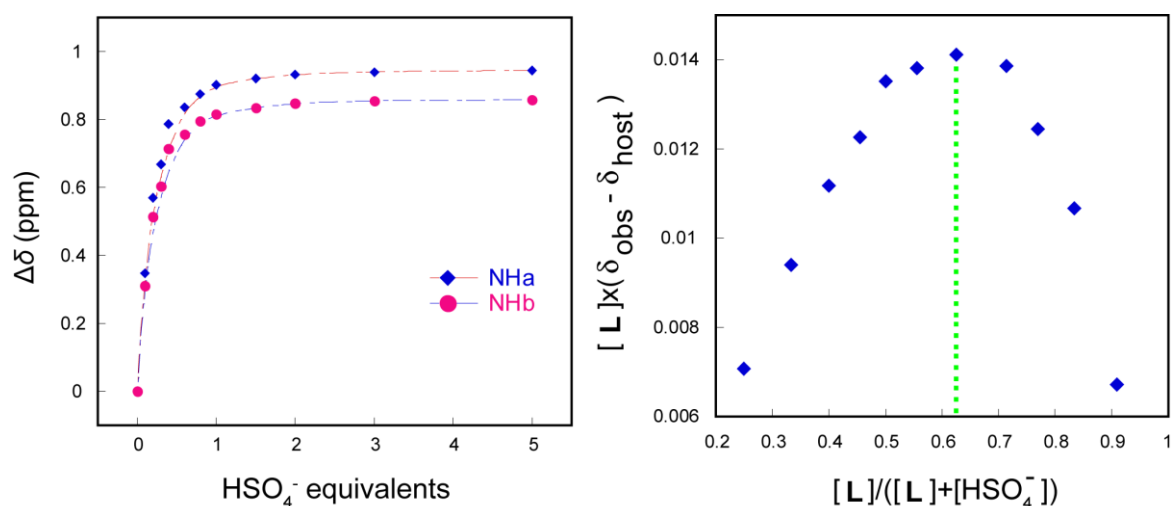

**Figure S22.** Change in chemical shift of -NH resonances of **L** (10 mM) with increasing concentration of standard  $\text{HSO}_4^-$  solution (50 mM) in  $\text{DMSO-}d_6$  at 298 K and the corresponding Job's plot.

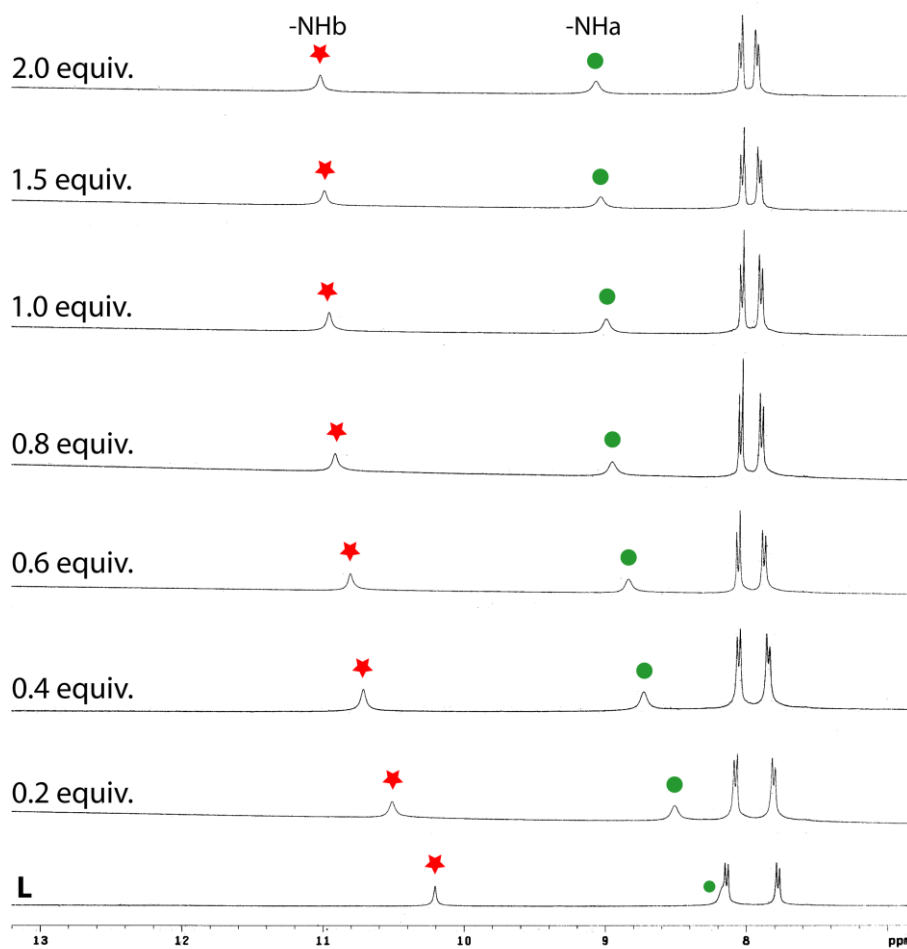

**Figure S23.** Expanded  $^1\text{H}$  NMR spectra of **L** upon titration with  $\text{HSO}_4^-$  ions in  $\text{DMSO-}d_6$ .

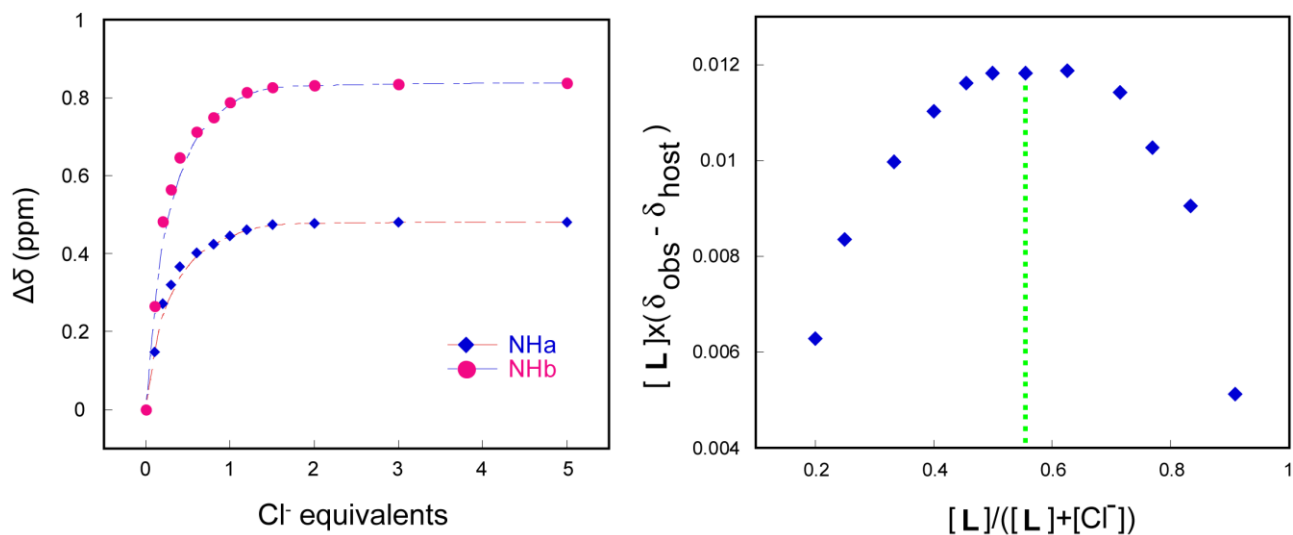

**Figure S24.** Change in chemical shift of  $-\text{NH}$  resonances of **L** (10 mM) with increasing concentration of standard  $\text{Cl}^-$  solution (50 mM) in  $\text{DMSO}-d_6$  at 298 K and the corresponding Job's plot.

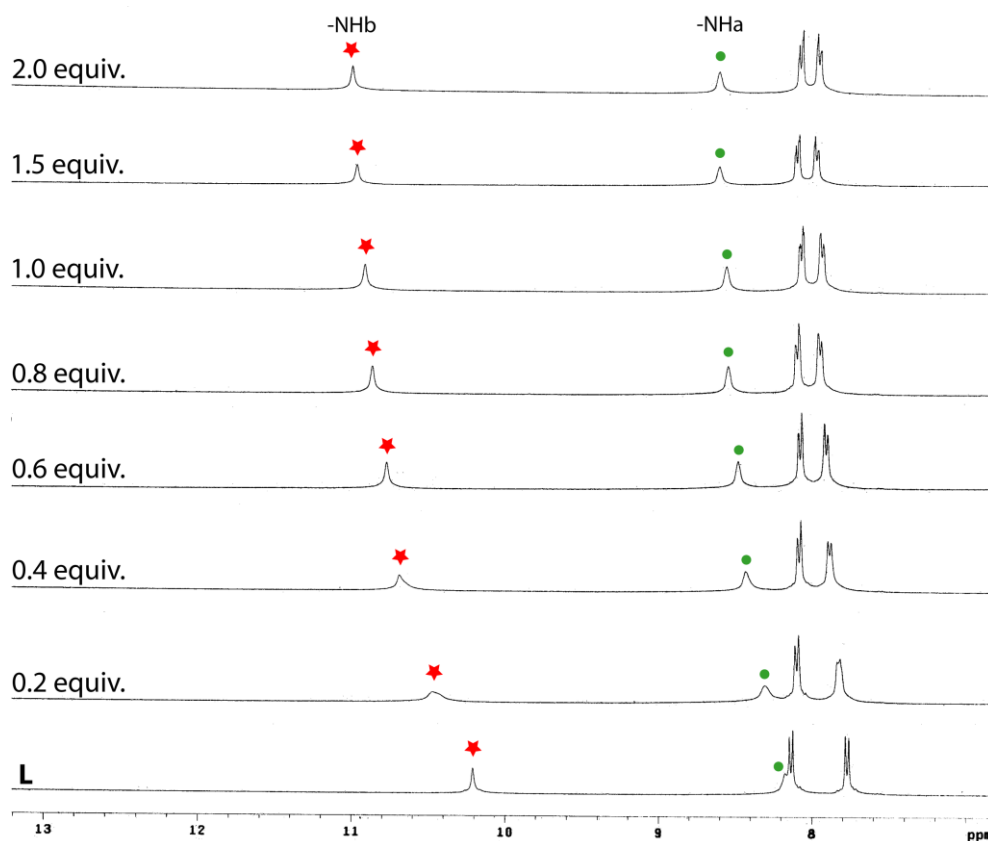

**Figure S25.** Expanded  $^1\text{H}$  NMR spectra of **L** upon gradual addition of  $\text{Cl}^-$  ions in  $\text{DMSO}-d_6$ .

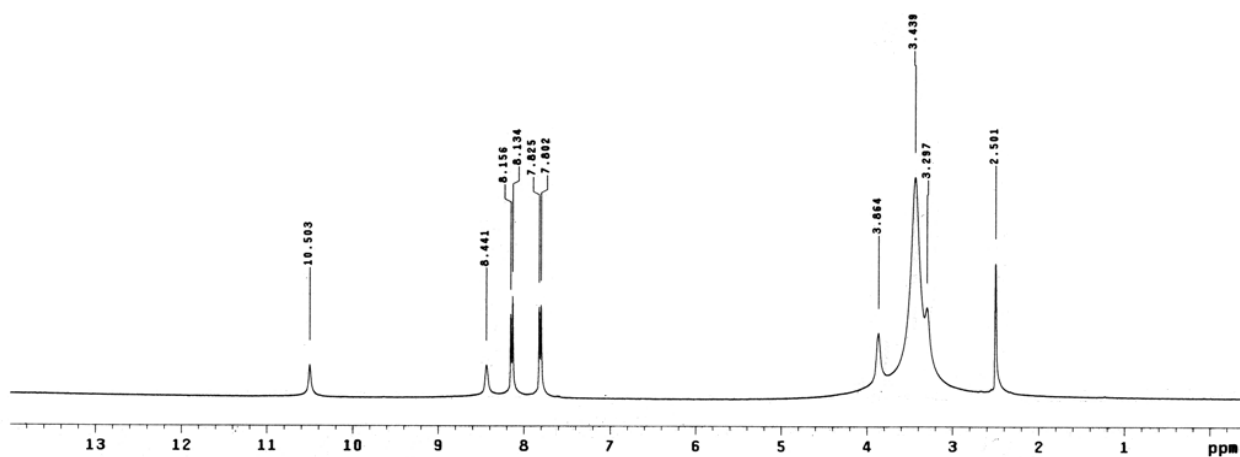

Figure S26.  $^1\text{H}$  NMR spectrum of isolated salt of **L** with orthophosphoric acid ( $\text{H}_3\text{PO}_4$ ).

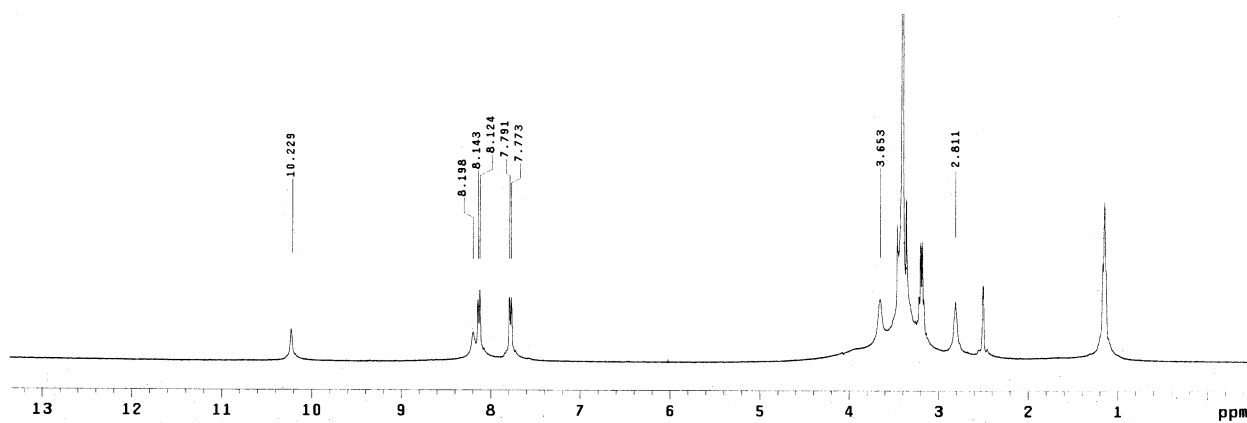

Figure S27.  $^1\text{H}$  NMR spectrum of **L** in presence of tetraethyl ammonium nitrate.

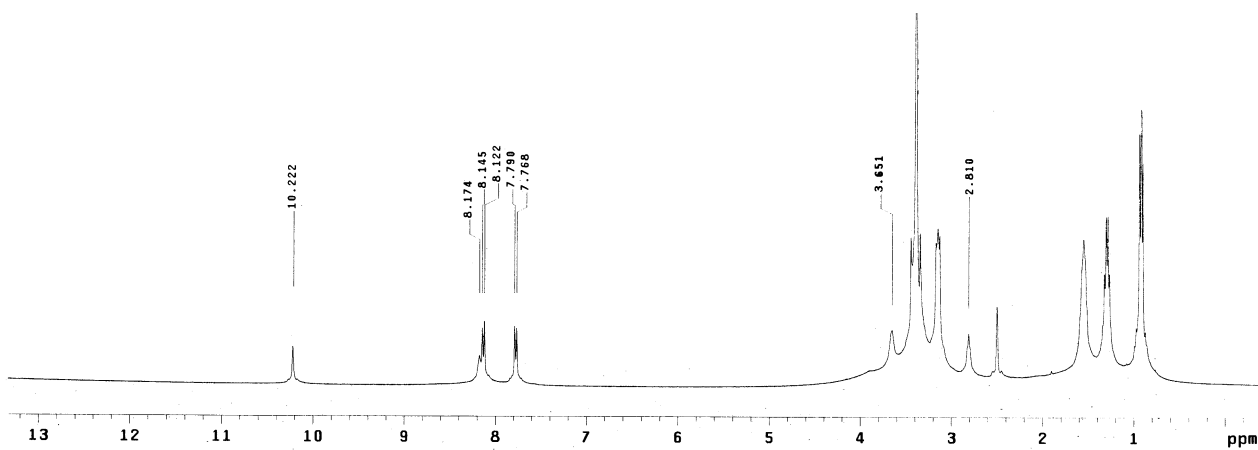

Figure S28.  $^1\text{H}$  NMR spectrum of **L** in presence of tetrabutylammonium perchlorate.

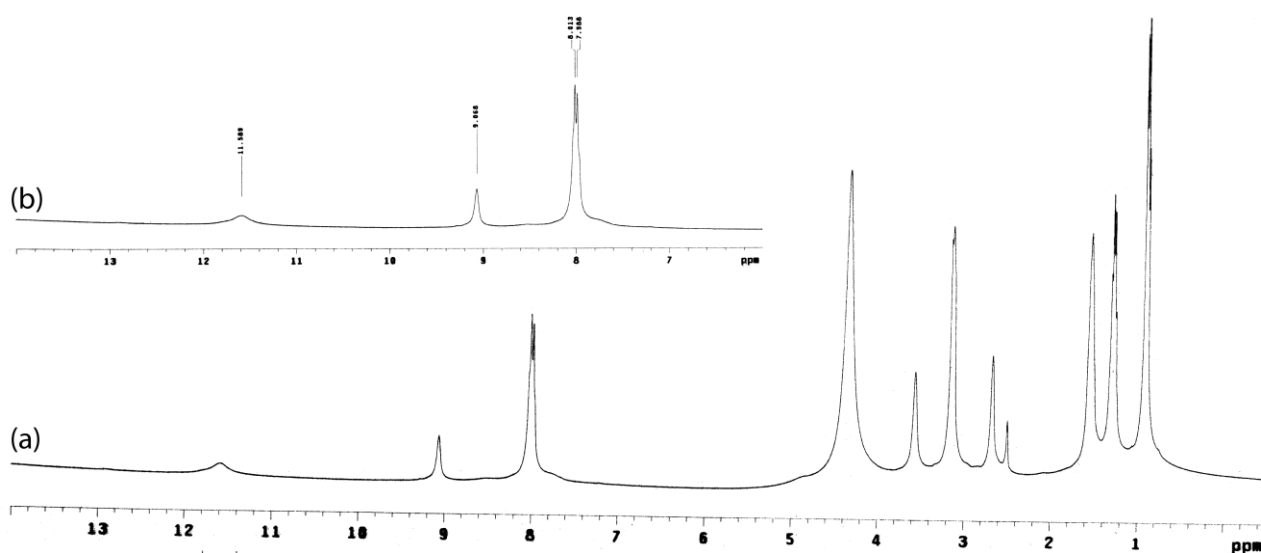

**Figure S29.** (a) <sup>1</sup>H NMR spectrum of **L** in presence of 1 equivalent of tetrabutylammonium H<sub>2</sub>PO<sub>4</sub><sup>-</sup> recorded after overnight equilibration in DMSO-*d*<sub>6</sub>; (b) Partial <sup>1</sup>H NMR spectrum (aromatic region) shows that, PO<sub>4</sub><sup>3-</sup> complex (**1**) does not form at equivalent stoichiometry of H<sub>2</sub>PO<sub>4</sub><sup>-</sup>.

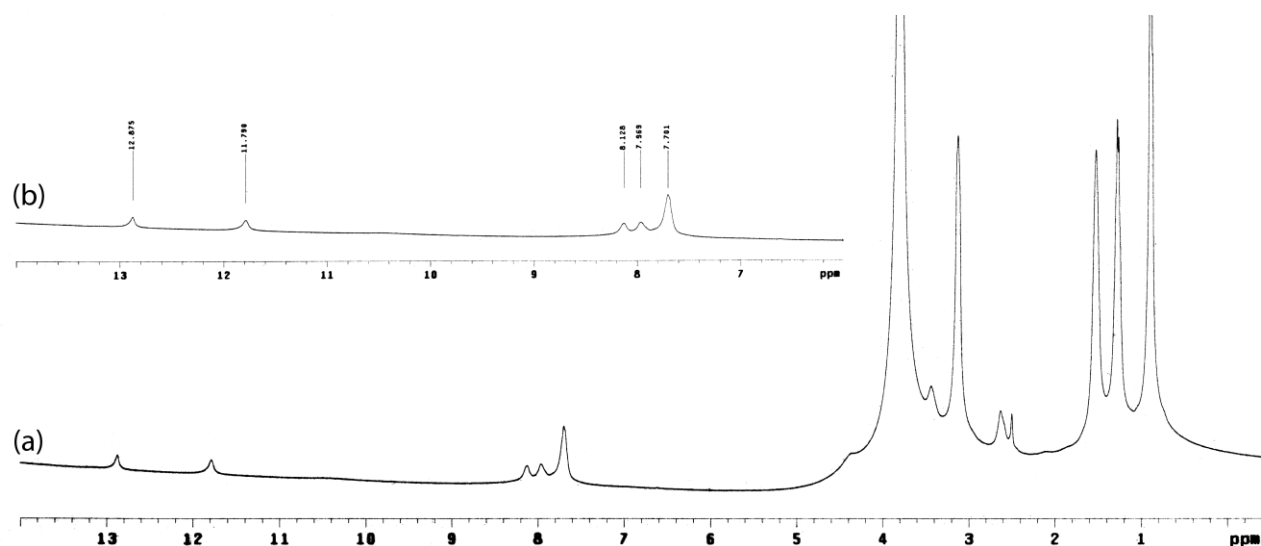

**Figure S30.** (a) <sup>1</sup>H NMR spectrum of **L** in presence of 3 equivalent of tetrabutylammonium dihydrogenphosphate recorded after overnight equilibration in DMSO-*d*<sub>6</sub>; (b) Partial <sup>1</sup>H NMR spectrum (aromatic region) shows insitu generation of PO<sub>4</sub><sup>3-</sup> complex (**1**) in greater percentage than the complex formed between added H<sub>2</sub>PO<sub>4</sub><sup>-</sup> and **L**.

#### References:

1. I. Ravikumar, P. S. Lakshminarayanan, M. Arunachalam, E. Suresh and P. Ghosh, Dalton Trans., 2009, 4160–4168.
